# Supplementary material for: Evaluating the use of a recommender system for selecting optimal messages for smoking cessation: patterns and effects of user-system engagement
Source: Springer Nature journal article supplement (doi:10.1186/s12889-021-11803-8), 2021-09-25
Supplement: MOESM2 [file 23183462]

## Additional File 2: Trend of user-system engagement over time

The following figure provides detailed information about the data points in Figure 1 from the main paper.

**Figure A2-1.** Trend of responses over time, for users with different levels of 6-month response rate

(a)

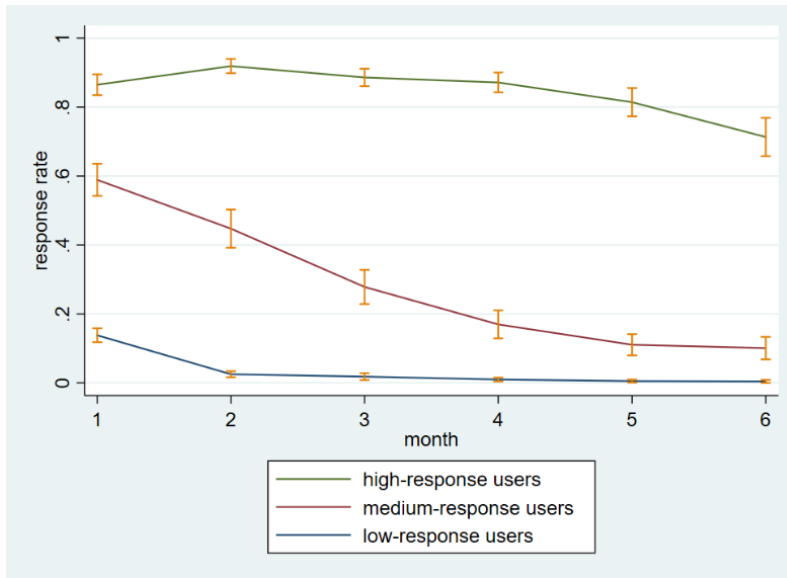

| User groups, by level of 6-month response rate | Response rate per month, mean (95% confidence interval) |                      |                      |                      |                        |                        |
|------------------------------------------------|---------------------------------------------------------|----------------------|----------------------|----------------------|------------------------|------------------------|
|                                                | 1                                                       | 2                    | 3                    | 4                    | 5                      | 6                      |
| High: > 0.6 & ≤ 1                              | 0.86<br>(0.83, 0.90)                                    | 0.92<br>(0.90, 0.94) | 0.89<br>(0.86, 0.91) | 0.87<br>(0.84, 0.90) | 0.81<br>(0.77, 0.86)   | 0.71<br>(0.66, 0.77)   |
| Medium: > 0.1 & ≤ 0.6                          | 0.59<br>(0.54, 0.64)                                    | 0.45<br>(0.39, 0.50) | 0.28<br>(0.23, 0.33) | 0.17<br>(0.13, 0.21) | 0.11<br>(0.08, 0.14)   | 0.10<br>(0.07, 0.13)   |
| Low: > 0 & ≤ 0.1                               | 0.14<br>(0.12, 0.16)                                    | 0.02<br>(0.02, 0.03) | 0.02<br>(0.01, 0.03) | 0.01 (0.004, 0.02)   | 0.005<br>(0.001, 0.01) | 0.004<br>(0.000, 0.01) |

(b)

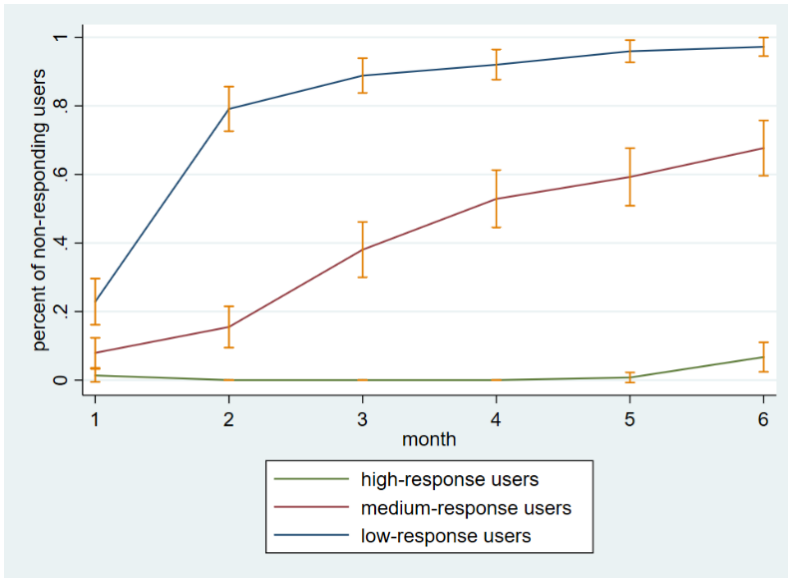

| User groups, by level of 6-month response rate | Percent of users not responding (%) |      |      |      |      |      |
|------------------------------------------------|-------------------------------------|------|------|------|------|------|
|                                                | 1                                   | 2    | 3    | 4    | 5    | 6    |
| High: $> 0.6 \ \& \ \leq 1$                    | 0.01                                | 0    | 0    | 0    | 0.01 | 0.07 |
| Medium: $> 0.1 \ \& \ \leq 0.6$                | 0.08                                | 0.15 | 0.38 | 0.53 | 0.60 | 0.68 |
| Low: $> 0 \ \& \ \leq 0.1$                     | 0.23                                | 0.79 | 0.89 | 0.92 | 0.96 | 0.97 |
